# Supplementary material for: Silver and Copper Acute Effects on Membrane Proteins and Impact on Photosynthetic and Respiratory Complexes in Bacteria
Source: PubMed Central journal article supplement (PMC6247083; doi:10.1128/mbio.01535-18), 2018-11-20
Supplement: mbo006184167sf1.pdf [file mbo006184167sf1.pdf]

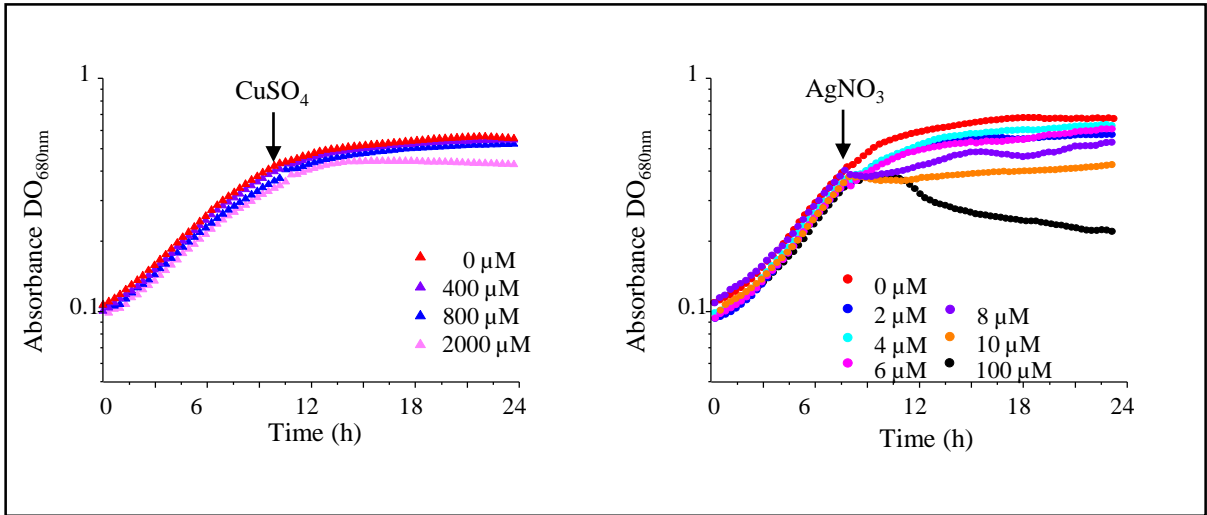

**Fig. S1:** Toxicity of CuSO<sub>4</sub> and AgNO<sub>3</sub> in high cell density culture. Cells were grown in micro-aerobiosis on microplates in the Tecan Infinite M200 luminometer. Indicated concentrations of CuSO<sub>4</sub> or AgNO<sub>3</sub> were added to the growth medium after cells reached OD<sub>680nm</sub>=0.4 (arrow).
