# Supplementary material for: Silver and Copper Acute Effects on Membrane Proteins and Impact on Photosynthetic and Respiratory Complexes in Bacteria
Source: PubMed Central journal article supplement (PMC6247083; doi:10.1128/mbio.01535-18), 2018-11-20
Supplement: mbo006184167sf2.pdf [file mbo006184167sf2.pdf]

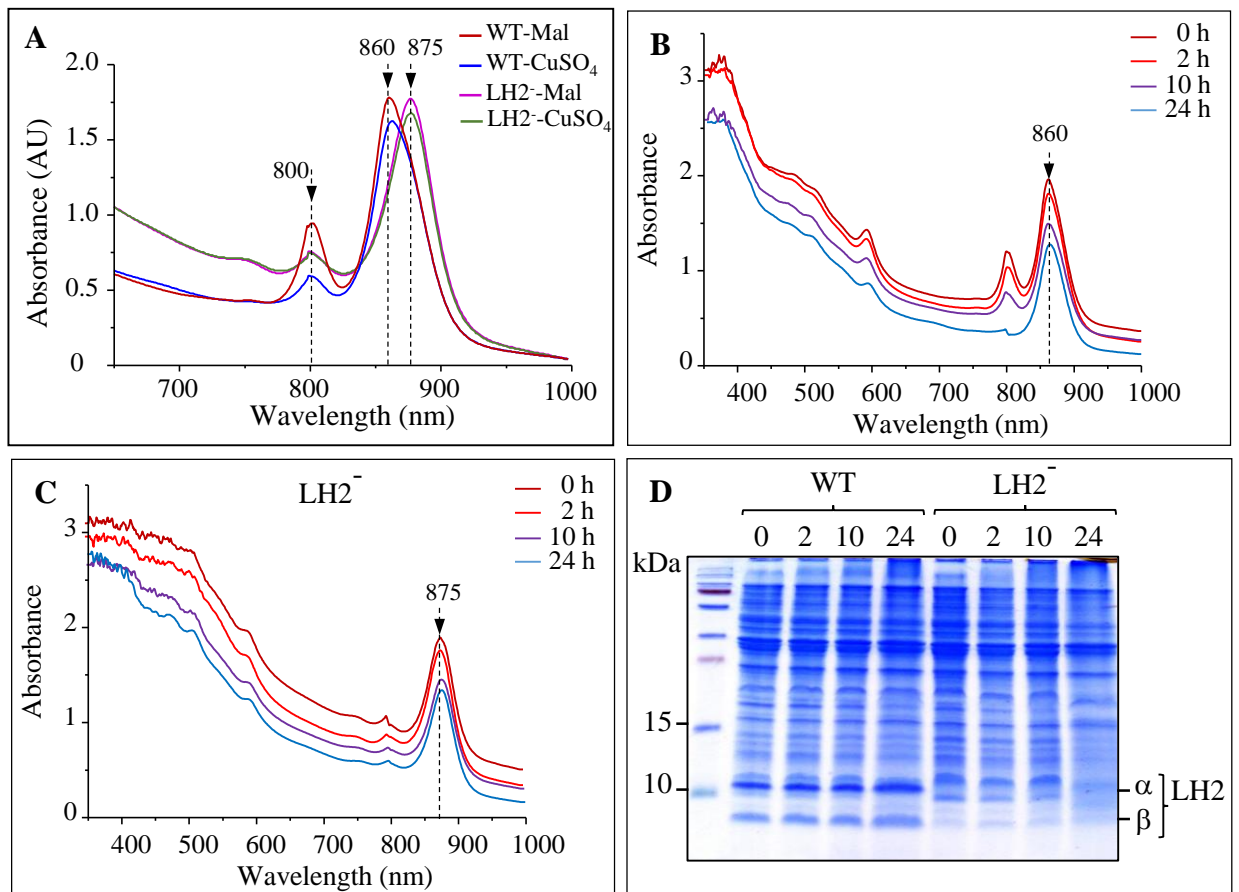

**Fig. S2: Effect of CuSO<sub>4</sub> on LH2 complex.** **A-** Absorption spectra of WT and LH2 deficient mutant cells grown overnight under photosynthetic condition and untreated (-Mal, red and magenta lines for the WT and LH2<sup>-</sup> strains respectively) or exposed to 1 mM CuSO<sub>4</sub> (blue and green lines for the WT and LH2<sup>-</sup> strains respectively). **B-** Absorption spectra of WT cells grown overnight under photosynthetic condition and exposed to 1 mM CuSO<sub>4</sub>. The 350-1000 nm spectra were recorded after 2, 10 and 24 h. **C-** Spectral analyses of the LH2 deficient mutant cells exposed to 1 mM CuSO<sub>4</sub>. Spectra were recorded after 2, 10 and 24 h. **D-** Coomassie blue staining of total protein lysate from untreated or CuSO<sub>4</sub> treated cells.
