# Supplementary material for: Silver and Copper Acute Effects on Membrane Proteins and Impact on Photosynthetic and Respiratory Complexes in Bacteria
Source: PubMed Central journal article supplement (PMC6247083; doi:10.1128/mbio.01535-18), 2018-11-20
Supplement: mbo006184167sf3.pdf [file mbo006184167sf3.pdf]

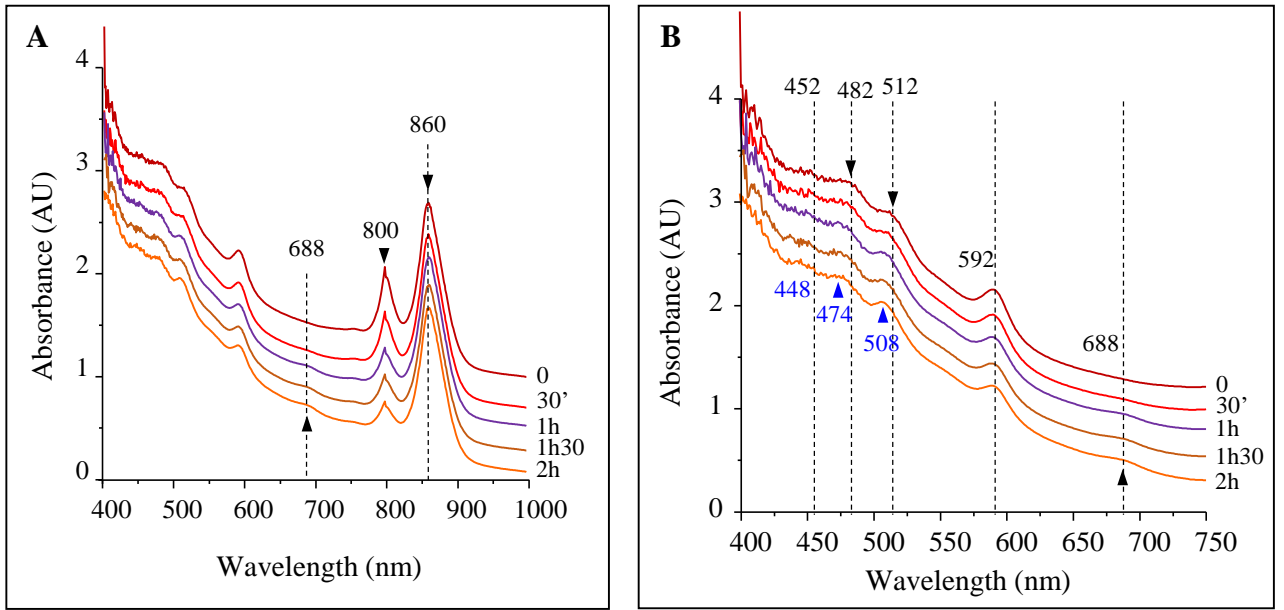

**Fig. S3:** Effect of AgNO<sub>3</sub> treatment on LH2 complexes in membrane-enriched fractions.

**A-** Membrane fractions were mixed with AgNO<sub>3</sub> at a final concentration of 2 mM and 350-1000 nm spectra were recorded every 30 min. **B-** Zoom in the 400 -750 nm spectrum absorbance region highlighting the shift in the carotenoid bands and the increase in the 688 nm band.
